# Supplementary material for: Genomic analysis of Bacillus cereus NWUAB01 and its heavy metal removal from polluted soil
Source: PubMed Central journal article supplement (PMC7665202; doi:10.1038/s41598-020-75170-x), 2020-11-12
Supplement: 41598_2020_75170_MOESM1_ESM.pdf [file 41598_2020_75170_MOESM1_ESM.pdf]

**Genomic analysis of *Bacillus cereus* NWUAB01 and its heavy metal removal from polluted soil**

**Ayansina Segun Ayangbenro and Olubukola Oluranti Babalola \***

**Food Security and Safety, Faculty of Natural and Agricultural Sciences, North-West University, Private Bag X2046, Mmabatho 2735, South Africa.**

\*Correspondence: [Olubukola.Babalola@nwu.ac.za](mailto:Olubukola.Babalola@nwu.ac.za); +27183892568

**Table S1. The growth rate of strain NWUAB01 on each of the metal tested and the control**

|         | Generation time | Number of generations | Specific growth rate |
|---------|-----------------|-----------------------|----------------------|
| Cd      | 88.87           | 0.27                  | 0.01                 |
| Cr      | 93.67           | 0.26                  | 0.01                 |
| Pb      | 61.34           | 0.39                  | 0.01                 |
| Control | 88.87           | 0.27                  | 0.01                 |

**Table S2. Heavy metal removal by strain NWUAB01 and its biosurfactant**

| <b>Metal</b> | <b>Biosurfactant</b>   | <b>Strain NWUAB01</b>  |
|--------------|------------------------|------------------------|
|              | Percentage removal (%) | Percentage removal (%) |
| Cd           | 54.30                  | 60.90                  |
| Cr           | 43.52                  | 30.85                  |
| Pb           | 69.78                  | 83.83                  |
| Multi-metal  |                        |                        |
| Cd           | 40.13                  | 45.80                  |
| Cr           | 30.45                  | 33.72                  |
| Pb           | 65.23                  | 72.39                  |

**Table S3. The sampling sites and their corresponding metal concentration**

| Sampling site  | Location                             | Cd (mg/kg)             | Cr (mg/kg)             | Pb (mg/kg)              | Zinc (mg/kg)           |
|----------------|--------------------------------------|------------------------|------------------------|-------------------------|------------------------|
| 1              | 26° 10' 5.27" S<br>25° 14' 47.69" E  | 0.26±0.00 <sup>b</sup> | 0.35±0.00 <sup>c</sup> | 1.86±0.00 <sup>b</sup>  | 0.96±0.00 <sup>b</sup> |
| 2              | 26° 10' 14.28" S<br>25° 14' 14.58" E | 0.02±0.00 <sup>d</sup> | 0.27±0.01 <sup>f</sup> | 0.23±0.01 <sup>de</sup> | 0.3±0.02 <sup>c</sup>  |
| 3              | 26° 10' 3.19" S<br>25° 15' 19.47" E  | 0.04±0.00 <sup>c</sup> | 0.37±0.00 <sup>b</sup> | 0.3±0.01 <sup>c</sup>   | 0.16±0.00 <sup>d</sup> |
| 4              | 26° 10' 2.18" S<br>25° 15' 20.66" E  | 0.36±0.00 <sup>a</sup> | 0.41±0.00 <sup>a</sup> | 2.4±0.04 <sup>a</sup>   | 1.2±0.00 <sup>a</sup>  |
| 5              | 26° 11' 11.03" S<br>25° 15' 20.66" E | 0.03±0.00 <sup>d</sup> | 0.29±0.00 <sup>e</sup> | 0.21±0.00 <sup>de</sup> | 0.07±0.00 <sup>g</sup> |
| 6              | 26° 11' 11.01" S<br>25° 15' 40.87" E | 0.02±0.00 <sup>d</sup> | 0.22±0.00 <sup>g</sup> | 0.2±0.00 <sup>e</sup>   | 0.07±0.00 <sup>g</sup> |
| 7              | 26° 9' 40.15" S<br>25° 14' 55.40" E  | 0.02±0.00 <sup>d</sup> | 0.27±0.00 <sup>f</sup> | 0.25±0.00 <sup>cd</sup> | 0.14±0.00 <sup>e</sup> |
| 8<br>(Control) | 26° 6' 42.59" S<br>25° 9' 24.52" E   | 0.03±0.00 <sup>c</sup> | 0.33±0.00 <sup>d</sup> | 0.28±0.00 <sup>c</sup>  | 0.11±0.00 <sup>f</sup> |

Values are means of triplicate readings ± standard error

Values with the same letter within a column are not significantly different ( $P < 0.05$ )

**Table S4. The sequences of the primer sets used for amplification of 16S rRNA and heavy metal-resistant genes**

| Primer      | Primer sequence                                       | Expected band size (bp) | Reference                        |
|-------------|-------------------------------------------------------|-------------------------|----------------------------------|
| 16S rRNA    | F- AGAGTTTGATCCTGGCTCAG<br>R- ACGGCTACCTTGTTACGACTT   | 1,500                   | Marin, et al. <sup>1</sup>       |
| <i>CzcA</i> | F- GTTTGAACGTATCATTAGTTTC<br>R - GTAGCCATCCGAAATATTCG | 1,885                   | Nies, et al. <sup>2</sup>        |
| <i>CzcD</i> | F- CAGGTCACCTGACACGACCAT<br>R- CATGCTGATGAGATTGATGATC | 398                     | Nies, et al. <sup>2</sup>        |
| <i>CzcB</i> | F- CTATTTCGAACAAACAAAAGG<br>R- CTTCAGAACAAAAGTGTGG    | 1,520                   | Abou-Shanab, et al. <sup>3</sup> |
| <i>PbrT</i> | F- ATGGTGATTGCTTTAGTT<br>R- TTAGGCTTGCTTCTTTTT        |                         | Shin, et al. <sup>4</sup>        |
| <i>PbrA</i> | F- ATGAGCGAATGTGGCTCGAAG<br>R- TCATCGACGCAACAGCCTCAA  | 766                     | Shin, et al. <sup>4</sup>        |
| <i>chrA</i> | F- CTTATACGCTACGCCAACTG<br>R- GTAATGGCATTTCAGTCGCTTG  | 1,292                   | Nies, et al. <sup>5</sup>        |
| <i>chrB</i> | F- GTCGTTAGCTTGCCAACATC<br>R- CGAAAGCAAGATGTGCGATCG   | 450                     | Nies, et al. <sup>5</sup>        |
| <i>cadA</i> | F- GACAAGACYGGMACYMTAC<br>R- GCRTGGTTRATSCGTC         | 600                     | Dell'Amico, et al. <sup>6</sup>  |

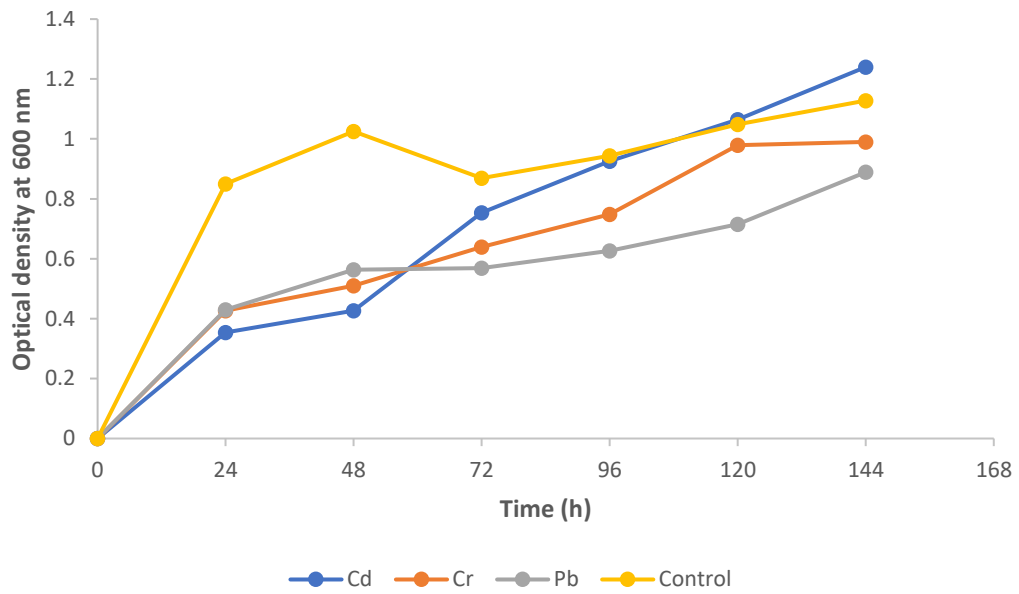

**Fig. S1 Time course growth of *B. cereus* NWUAB01 on different heavy metals**

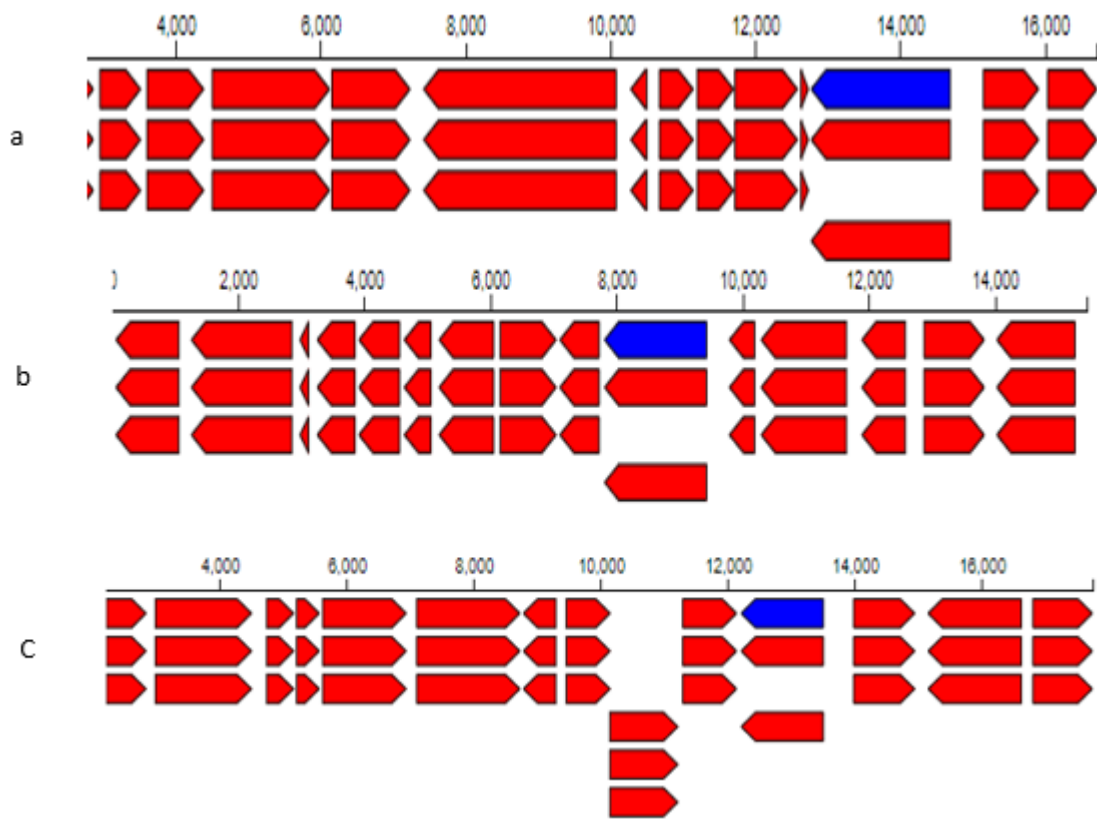

**Fig. S2 The annotation for (a) Lead, cadmium, zinc and mercury transporting ATPase (b) copper resistance protein and (c) manganese transport protein**

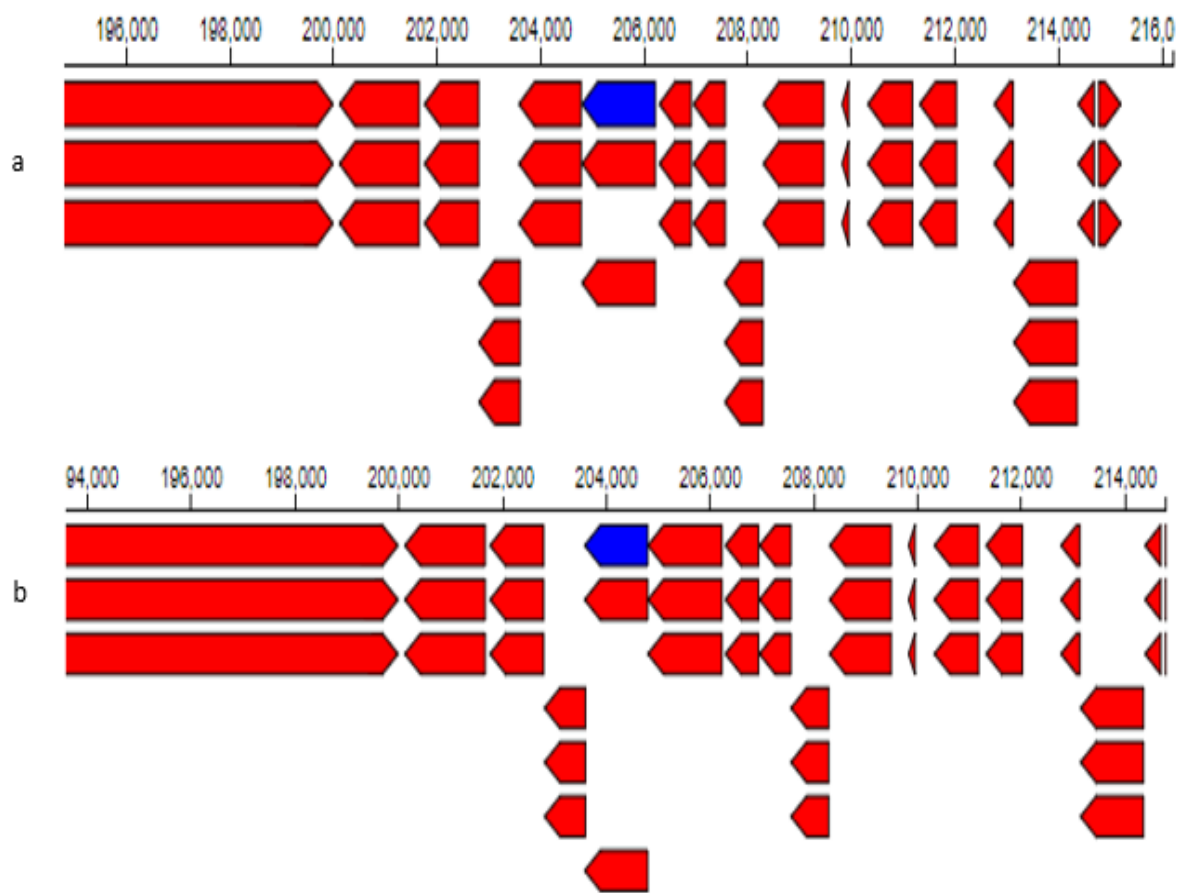

**Fig. S3 Gene annotation of the (a) Wzx and (b) Wzy and their respective locus on the genome of strain NWUAB01**



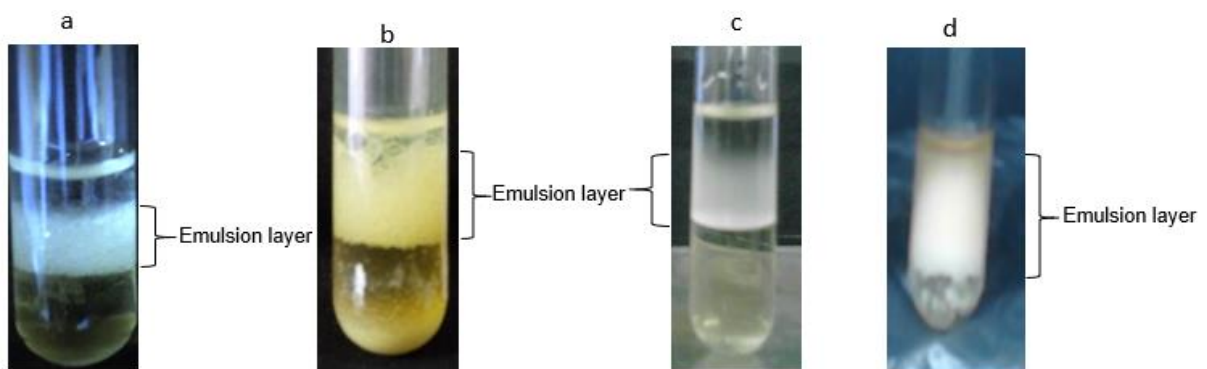

**Fig. S4 Emulsification of (a) kerosene (b) kerosene in the presence of heavy metals (c) vegetable oil (d) engine oil by strain NWUAB01**

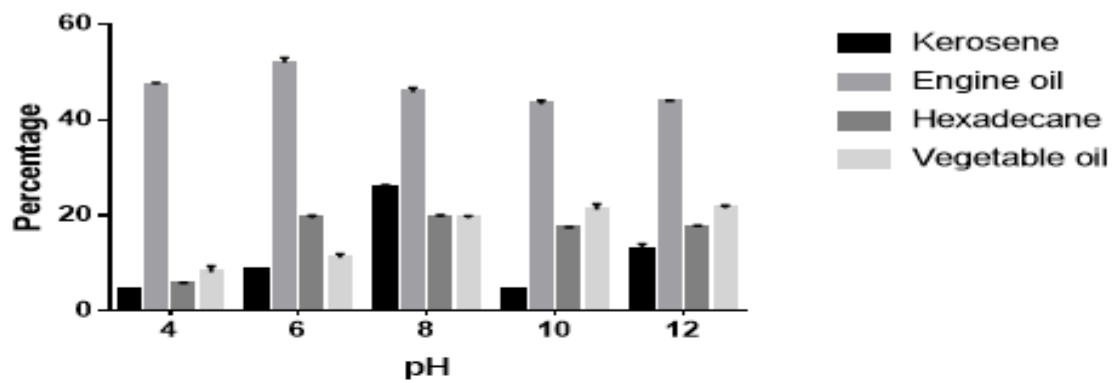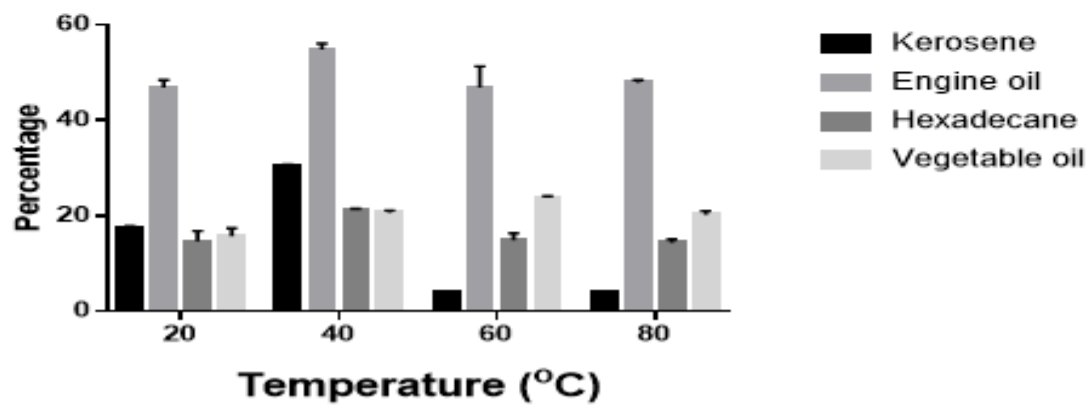

Fig. S5 Stability of the emulsion produced by strain NWUAB01 at different pH and temperature

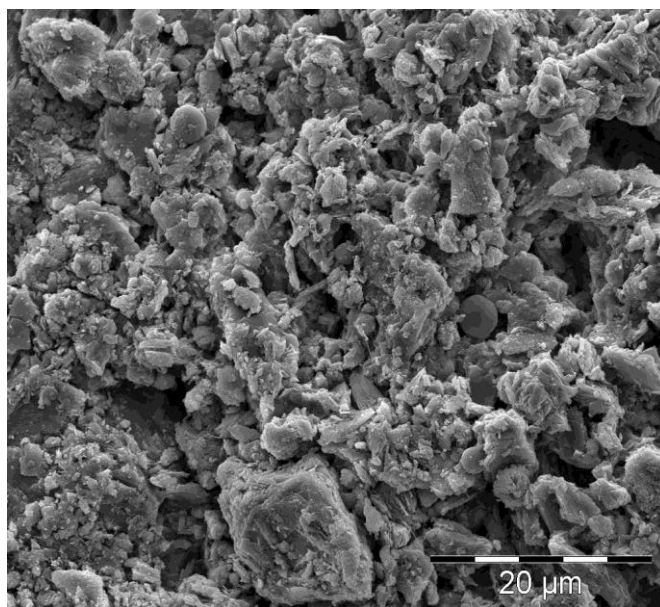

**Fig. S6** The SEM image of the biosurfactant produced by strain NWUAB01

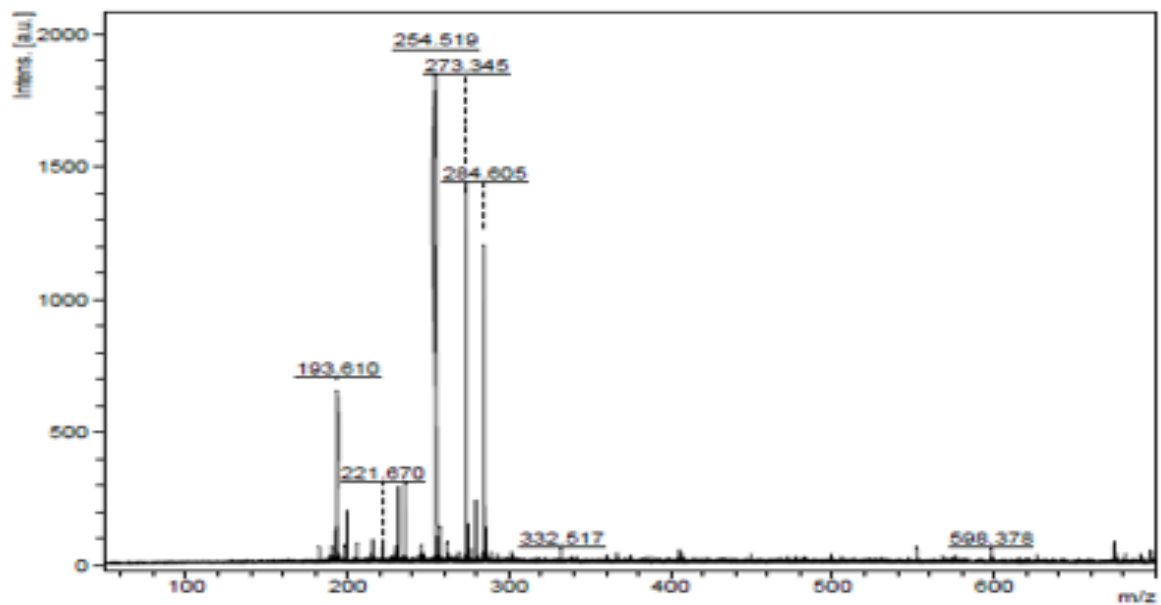

Fig. S7 The mass spectrum of the purified biosurfactant produced by strain NWUAB01

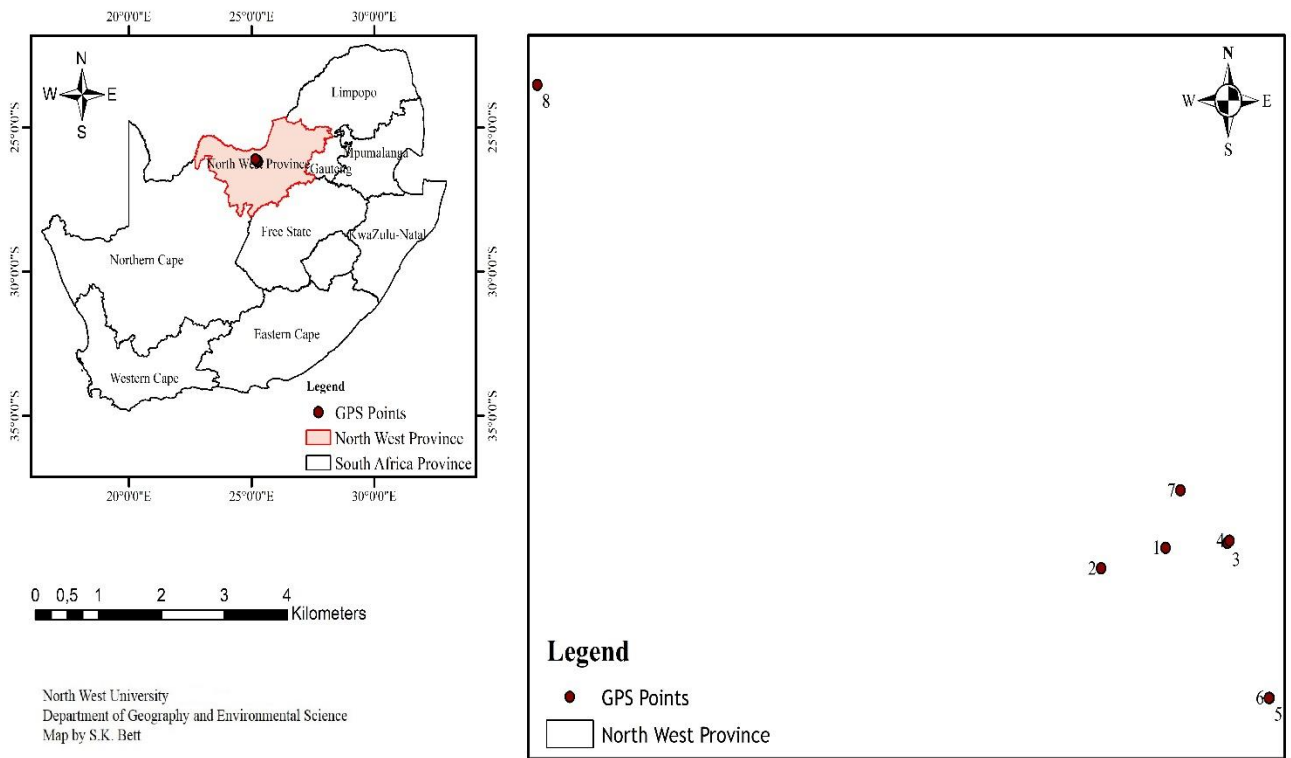

**Fig. S8** The map showing the sampling sites. The map was generated using ArcMap (version 10.5.1) (<https://desktop.arcgis.com/en/arcmap/>)

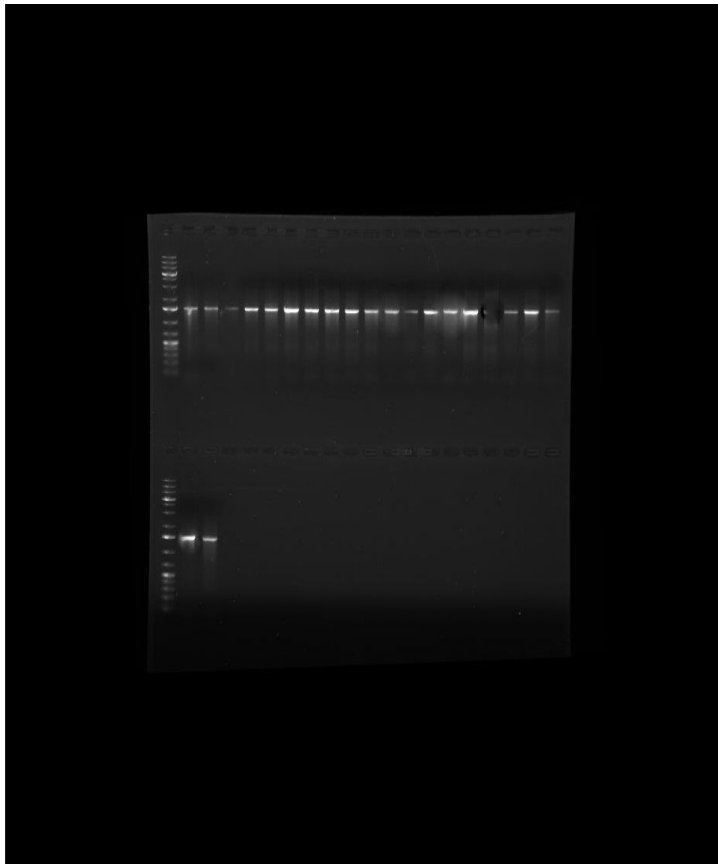

**Gel electrophoresis of the 16S rRNA gene of bacterial isolates from mining soil. It shows the predicted 1,500 bp amplicons of the isolates and negative for the control**

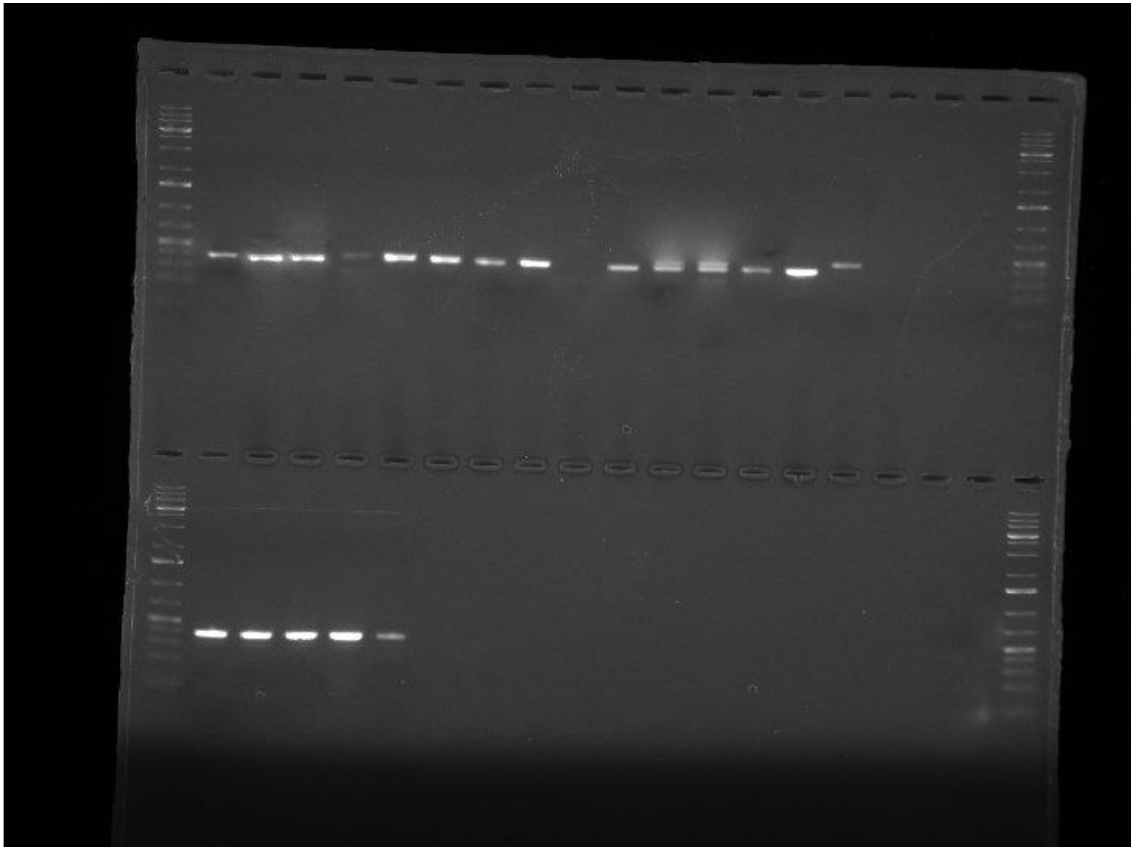

Gel electrophoresis of the *CzcD* gene of bacterial isolates from mining soil. It shows the predicted 398 bp amplicons for positive isolates and negative for the control

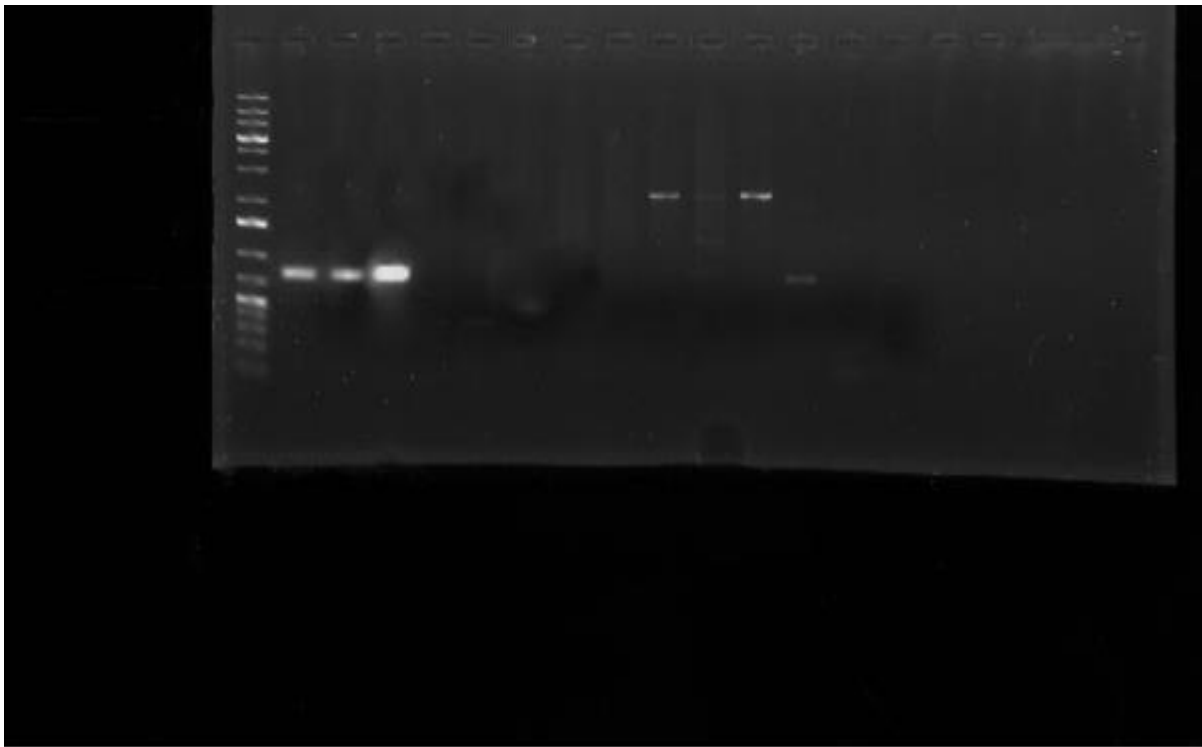

**Gel electrophoresis of the *PbrA* gene of bacterial isolates from mining soil. It shows the predicted 756 bp amplicons for positive isolates and negative for the control**



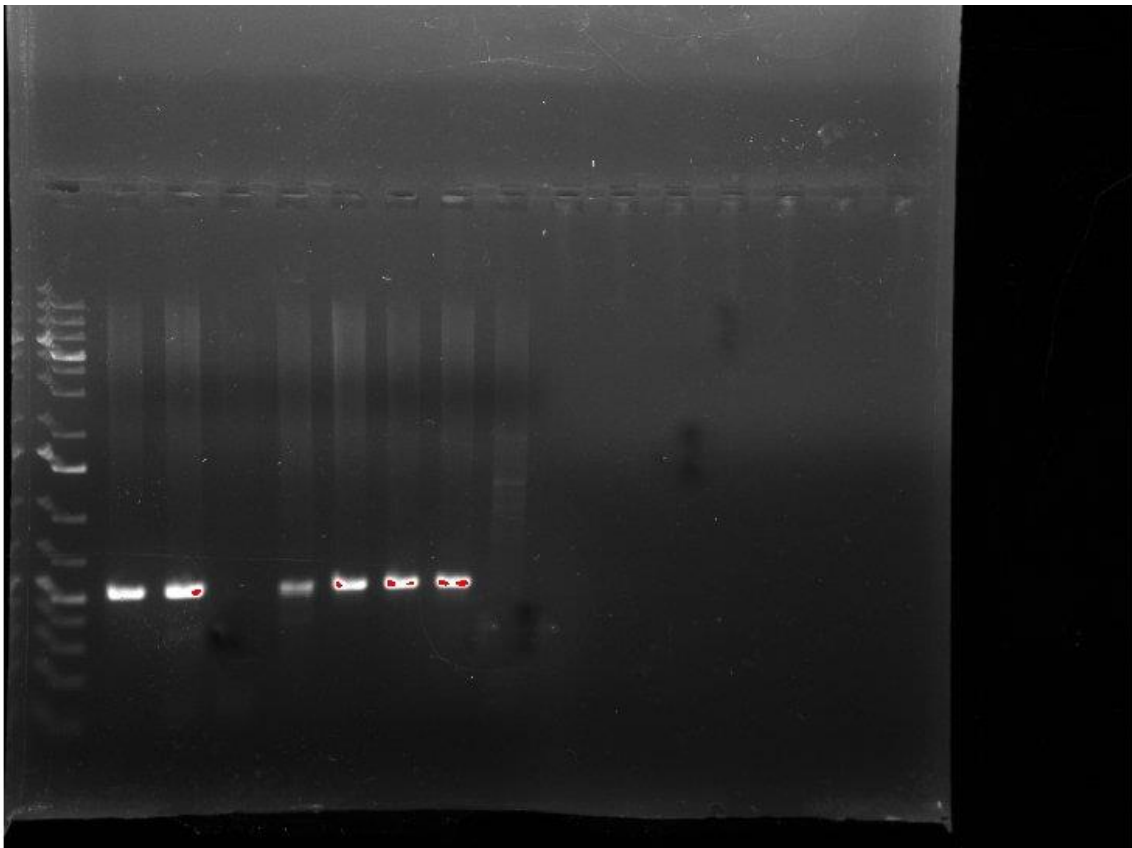

Gel electrophoresis of the *cadA* gene of bacterial isolates from mining soil. It shows the predicted 600 bp amplicons for positive isolates and negative for the control

## References

- 1 Marin, M. *et al.* The role of universal 16S rRNA gene PCR and sequencing in the diagnosis of prosthetic joint infection. *Journal of Clinical Microbiology* **50**, 583-589 (2011).
- 2 Nies, D. H., Nies, A., Chu, L. & Silver, S. Expression and nucleotide sequence of a plasmid-determined divalent cation efflux system from *Alcaligenes eutrophus*. *Proceedings of the National Academy of Sciences* **86**, 7351-7355 (1989).
- 3 Abou-Shanab, R., Van Berkum, P. & Angle, J. Heavy metal resistance and genotypic analysis of metal resistance genes in Gram-positive and Gram-negative bacteria present in Ni-rich serpentine soil and in the rhizosphere of *Alyssum murale*. *Chemosphere* **68**, 360-367 (2007).
- 4 Shin, M.-N. *et al.* Characterization of lead resistant endophytic *Bacillus* sp. MN3-4 and its potential for promoting lead accumulation in metal hyperaccumulator *Alnus firma*. *J. Hazard. Mater.* **199**, 314-320 (2012).
- 5 Nies, A., Nies, D. H. & Silver, S. Nucleotide sequence and expression of a plasmid-encoded chromate resistance determinant from *Alcaligenes eutrophus*. *J. Biol. Chem.* **265**, 5648-5653 (1990).
- 6 Dell'Amico, E., Mazzocchi, M., Cavalca, L., Allievi, L. & Andreoni, V. Assessment of bacterial community structure in a long-term copper-polluted ex-vineyard soil. *Microbiol. Res.* **163**, 671-683, doi:<https://doi.org/10.1016/j.micres.2006.09.003> (2008).
